# Supplementary material for: Water-soluble hemicelluloses for high humidity applications – enzymatic modification of xyloglucan for mechanical and oxygen barrier properties
Source: Royal Society of Chemistry journal article supplement (doi:10.1039/c3gc41823e), 2013-11-05
Supplement: c3gc41823e.pdf [file c3gc41823e.pdf]

1

## SUPPORTING INFORMATION FOR

2 Water-soluble hemicelluloses for high humidity applications -  
3 enzymatic modification of xyloglucan for mechanical and  
4 oxygen barrier properties

5

6

7

Joby J Kochumalayil, Lars A Berglund

8

### 9 Xyloglucan oligosaccharides

10 The four basic repeating units of xyloglucan oligosaccharides present in tamarind seed  
11 xyloglucan are presented in Figure S1

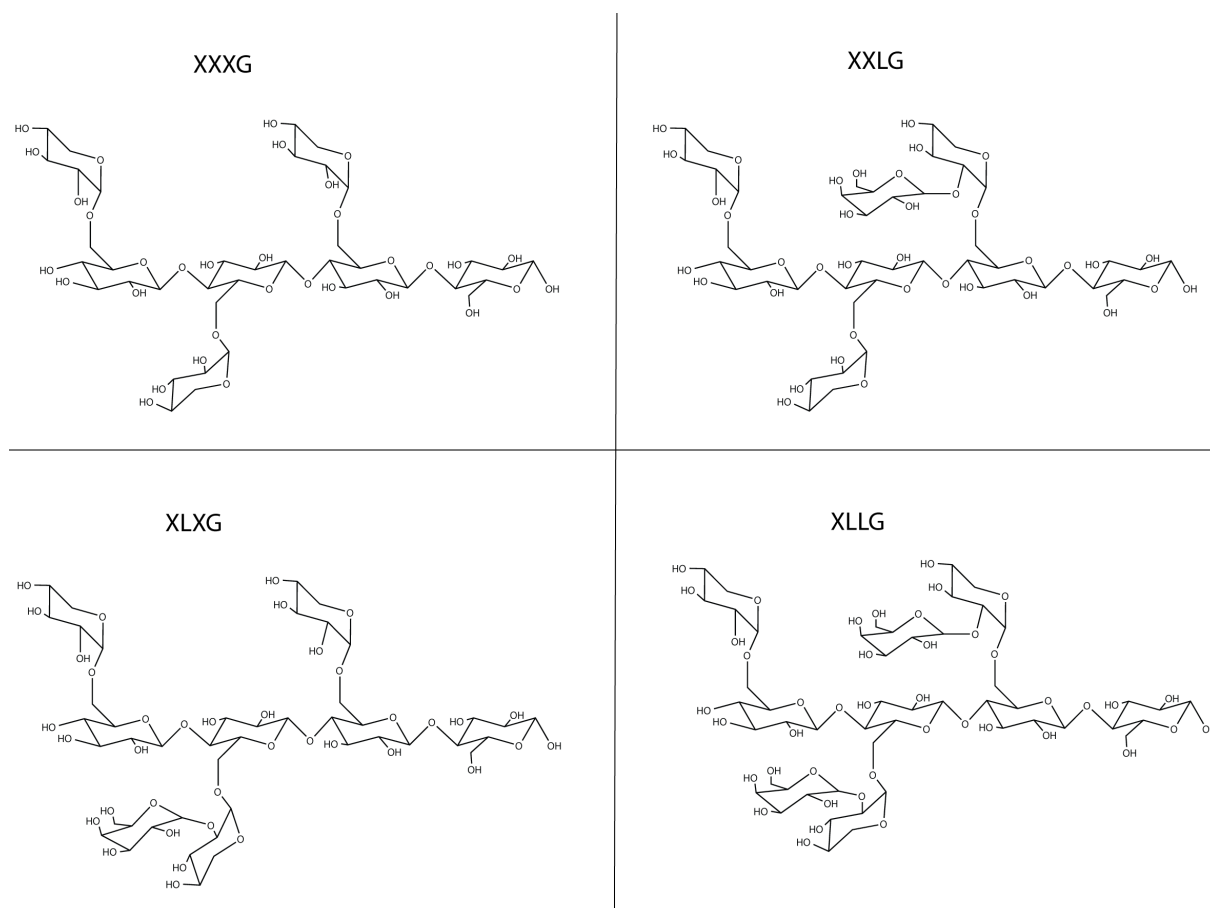

12

13 **Figure S1. Four basic repeating units of oligosaccharides present in tamarind seed xyloglucan**

14

15

## 16 **Modified xyloglucan dissolution**

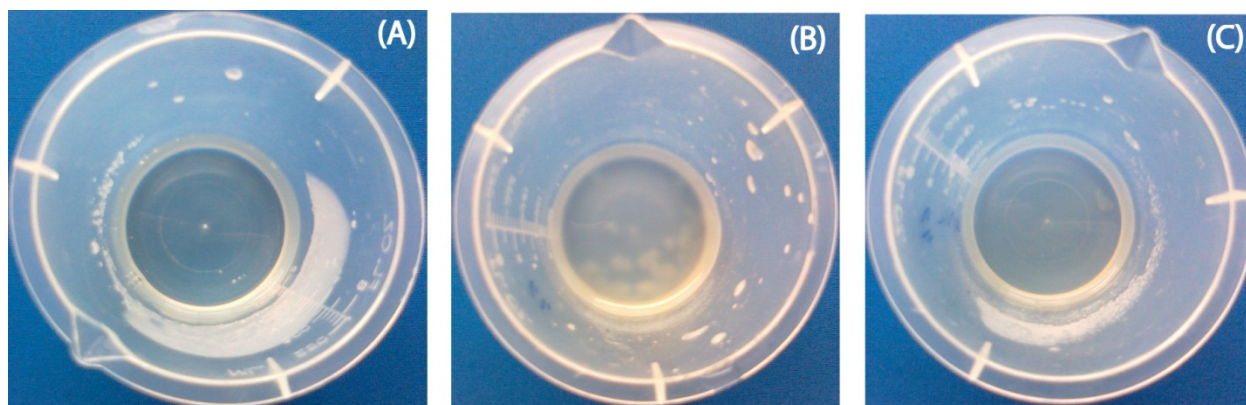

17  
18 **Figure S2 Photographs showing 1% aqueous solutions of (A) xyloglucan, (B) partially galactose removed**  
19 **modified xyloglucan (64 h enzyme treated sample), and (C) solution in (B) after mechanical**  
20 **homogenization and sonication**

## 21 22 **High performance anion exchange chromatography (HPAEC) analysis**

23 High performance anion exchange chromatography equipped with pulsed amperometric  
24 detector (HPAEC-PAD, Dionex ICS-3000) was used to determine the sugar composition of  
25 XG and modified XGs. The amount of sugar was calculated from the area corresponding to  
26 each sugar present in the material using calibration samples. Noting the initial amount of the  
27 material taken, the composition of sugars /100 mg of the sample was calculated and is given  
28 in manuscript Table 1. The data are presented in Figure S3-S6 and integration results obtained  
29 are given in tables S1-S4

30  
31

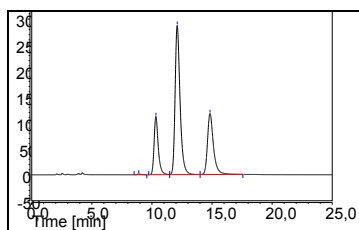

32

33 **Figure S3. HPAEC-PAD profile of sugars present in native XG**

34

35 **Table S1. Integration results for the sugar content in native XG evaluated by HPAEC-PAD**

| No.           | Peak Name | Retention Time<br>min | Area<br>nC*min | Height<br>nC   | Relative Area<br>% |
|---------------|-----------|-----------------------|----------------|----------------|--------------------|
| 1             | Arabinose | 8,908                 | 0,542          | 1,675          | 0,22               |
| 2             | Galactose | 10,333                | 45,164         | 112,286        | 18,01              |
| 3             | Glucose   | 12,108                | 137,582        | 287,884        | 54,85              |
| 4             | Xylose    | 14,833                | 67,542         | 117,643        | 26,93              |
| n.a.          | Mannose   | n.a.                  | n.a.           | n.a.           | n.a.               |
| <b>Total:</b> |           |                       | <b>250,830</b> | <b>519,489</b> | <b>100,00</b>      |

36

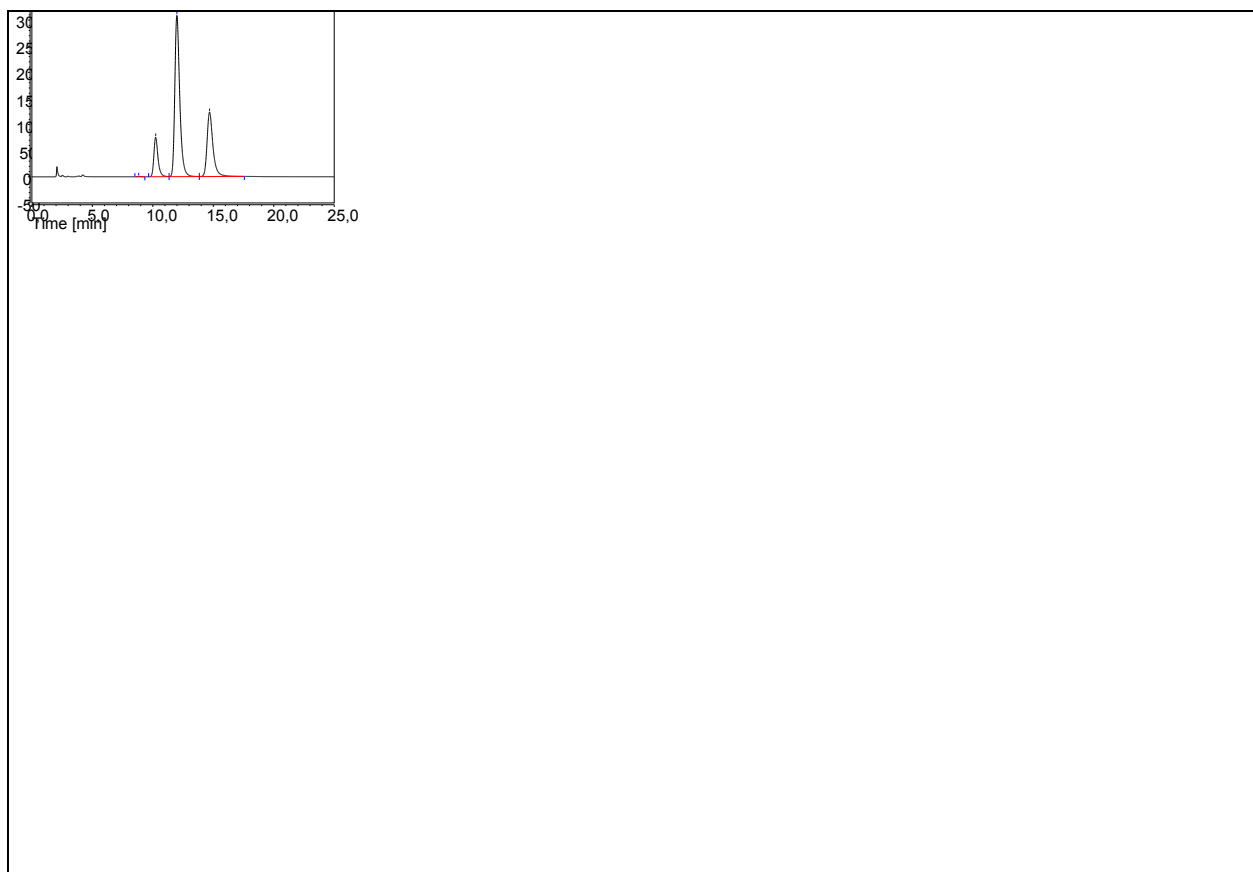

37

38 **Figure S4. HPAEC-PAD profile of sugars present in modified XG with 34% galactose removed.**

39

40 **Table S2. Integration results for the sugar content in modified XG (34% galactose removed) evaluated by**  
41 **HPAEC-PAD**

| No.           | Peak Name | Retention Time min | Area nC*min    | Height nC      | Relative Area % |
|---------------|-----------|--------------------|----------------|----------------|-----------------|
| 1             | Arabinose | 8,833              | 0,183          | 0,597          | 0,07            |
| 2             | Galactose | 10,233             | 30,054         | 75,953         | 12,17           |
| 3             | Glucose   | 11,992             | 146,595        | 309,178        | 59,35           |
| 4             | Xylose    | 14,692             | 70,152         | 123,356        | 28,40           |
| n.a.          | Mannose   | n.a.               | n.a.           | n.a.           | n.a.            |
| <b>Total:</b> |           |                    | <b>246,983</b> | <b>509,084</b> | <b>100,00</b>   |

42

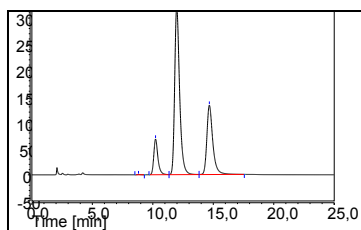

43

44 **Figure S5. HPAEC-PAD profile of sugars present in modified XG with 41% galactose removed.**

45

46 **Table S3. Integration results for the sugar content in modified XG (41% galactose removed) evaluated by**  
47 **HPAEC-PAD**

| No.           | Peak Name | Retention Time<br>min | Area<br>nC*min | Height<br>nC   | Relative Area<br>% |
|---------------|-----------|-----------------------|----------------|----------------|--------------------|
| 1             | Arabinose | 8,817                 | 0,147          | 0,477          | 0,06               |
| 2             | Galactose | 10,225                | 27,122         | 68,526         | 10,63              |
| 3             | Glucose   | 11,984                | 152,352        | 320,577        | 59,71              |
| 4             | Xylose    | 14,675                | 75,542         | 133,008        | 29,61              |
| n.a.          | Mannose   | n.a.                  | n.a.           | n.a.           | n.a.               |
| <b>Total:</b> |           |                       | <b>255,162</b> | <b>522,589</b> | <b>100,00</b>      |

48

49

50

51

52

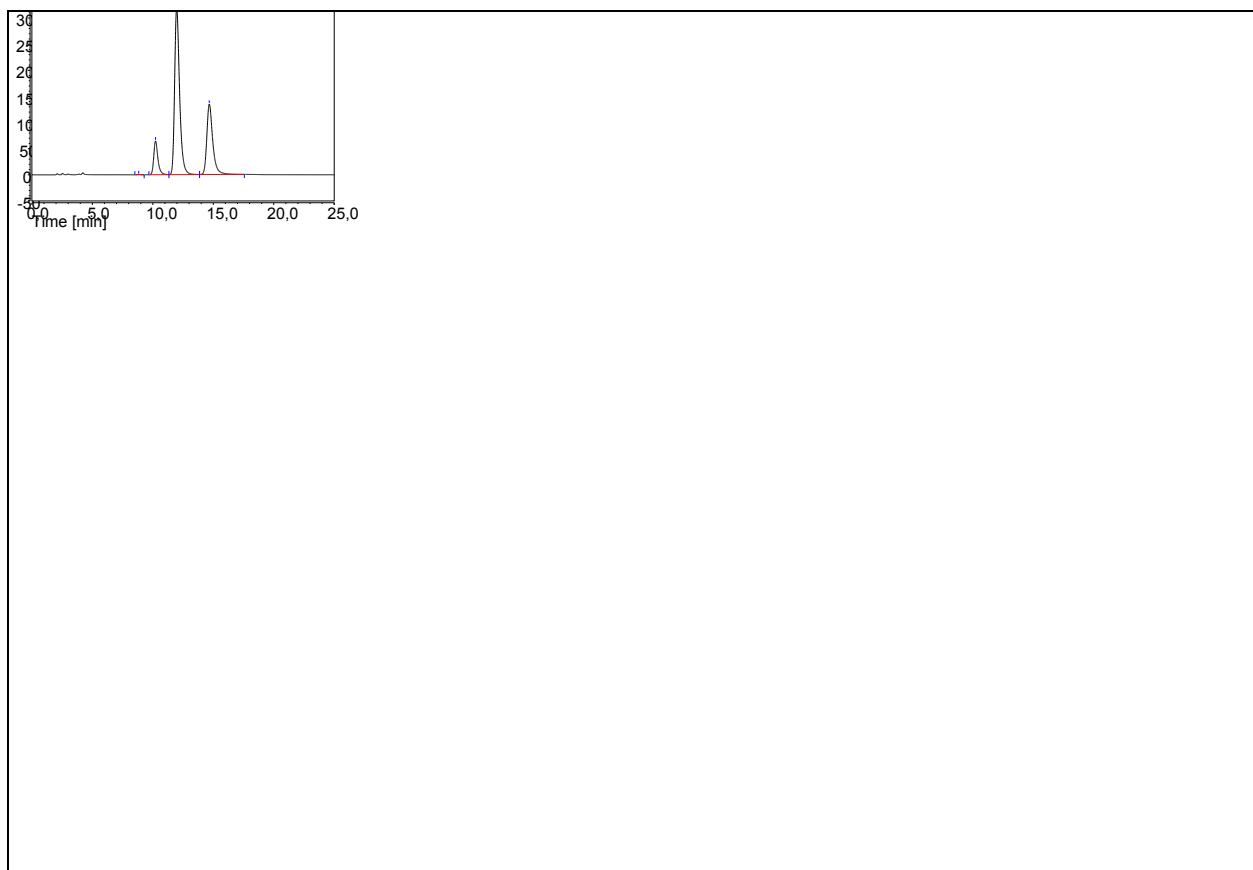

53

54 **Figure S6. HPAEC-PAD profile of sugars present in modified XG with 43% galactose removed.**

55

56 **Table S4. Integration results for the sugar content in modified XG (43% galactose removed) evaluated by**  
57 **HPAEC-PAD**

| No.           | Peak Name | Retention Time<br>min | Area<br>nC*min | Height<br>nC   | Relative Area<br>% |
|---------------|-----------|-----------------------|----------------|----------------|--------------------|
| 1             | Arabinose | 8,834                 | 0,154          | 0,494          | 0,06               |
| 2             | Galactose | 10,225                | 25,779         | 65,100         | 10,09              |
| 3             | Glucose   | 11,975                | 152,604        | 320,933        | 59,72              |
| 4             | Xylose    | 14,667                | 76,987         | 135,063        | 30,13              |
| n.a.          | Mannose   | n.a.                  | n.a.           | n.a.           | n.a.               |
| <b>Total:</b> |           |                       | <b>255,524</b> | <b>521,591</b> | <b>100,00</b>      |

58

59
